# Supplementary material for: Treatment Adherence and Health-Related Quality of Life in Patients with Hemophilia in Hong Kong
Source: MDPI journal article supplement (doi:10.3390/ijerph19116496), 2022-05-26
Supplement: s1 [file s1]

Supplement Table S1: Health-related Quality of Life Scores

|                          | Total (N = 56) |      | Pediatric patients (n = 14) |      | Adults patients (n = 42) |      |
|--------------------------|----------------|------|-----------------------------|------|--------------------------|------|
| Scores*                  | Mean           | SD   | Mean                        | SD   | Mean                     | SD   |
| <b>Overall HRQoL</b>     | 44.3           | 18.0 | 40.0                        | 21.5 | 45.7                     | 16.7 |
| Physical Health          | 43.4           | 22.2 | 36.9                        | 22.1 | 45.6                     | 22.1 |
| Feeling                  | 43.2           | 26.1 | 46.1                        | 26.9 | 42.3                     | 26.1 |
| View of Yourself         | 48.2           | 23.9 | 38.8                        | 26.9 | 51.3                     | 22.3 |
| Sport and Leisure        | 60.5           | 24.6 | 48.7                        | 34.2 | 64.4                     | 19.4 |
| Work and School          | 33.3           | 24.4 | 21.4                        | 20.0 | 37.2                     | 24.7 |
| Dealing with Haemophilia | 29.2           | 19.1 | 27.7                        | 26.3 | 29.8                     | 16.5 |
| Treatment                | 44.0           | 19.3 | 40.2                        | 19.2 | 45.3                     | 15.0 |
| Family                   | 39.4           | 25.5 | 53.6                        | 22.8 | 34.7                     | 24.8 |
| Future                   | 47.1           | 23.2 | 40.7                        | 27.8 | 49.3                     | 21.4 |

HRQoL: health-related quality of life; SD: standard deviation

\*A higher score is indicative of worse health-related quality of life (range: 0 to 100).

Supplement Table S2: Adherence Scores Among Patients Who Received Prophylactic Treatment

|                                            | Total (N = 38) |      | Pediatric patients (n = 12) |      | Adults patients (n = 26) |      |
|--------------------------------------------|----------------|------|-----------------------------|------|--------------------------|------|
| Scores [Cutoff score for “non-adherence”]* | Mean           | SD   | Mean                        | SD   | Mean                     | SD   |
| <b>Overall adherence [57]</b>              | 57.3           | 15.8 | 43.3                        | 10.2 | 63.7                     | 13.8 |
| Time [11]                                  | 9.5            | 4.2  | 6.4                         | 3.1  | 10.9                     | 3.9  |
| Dose [7]                                   | 8.9            | 3.1  | 8.1                         | 1.8  | 9.2                      | 3.5  |
| Plan [9]                                   | 8.7            | 3.2  | 8.7                         | 3.1  | 8.7                      | 3.3  |
| Remember [11]                              | 8.6            | 4.2  | 5.3                         | 1.9  | 10.0                     | 4.1  |
| Skip [11]                                  | 8.5            | 4.2  | 5.2                         | 1.3  | 10.0                     | 4.3  |
| Communicate [10]                           | 13.2           | 4.4  | 9.6                         | 4.5  | 14.8                     | 3.3  |

SD: standard deviation

\* A higher score is indicative of worse adherence. Score range for overall adherence: 24 – 120 Score range for all subscales: 4 – 20

Cutoff scores in square brackets refer to published thresholds defining “non-adherence” by the developers of the Validated Hemophilia Regimen Treatment Adherence Scale-Prophylaxis (VERITAS-Pro)

Supplement Table S3: Internal Consistency among Subscales

|                          | Cronbach's $\alpha$ | Corrected Item-scale Correlation | Potentially Problematic Items *                                                                                            |
|--------------------------|---------------------|----------------------------------|----------------------------------------------------------------------------------------------------------------------------|
| <b>Haem-A-QoL</b>        |                     |                                  |                                                                                                                            |
| Physical Health          | 0.88                | 0.53 – 0.85                      | <i>“I need more time to get ready”</i>                                                                                     |
| Feeling                  | 0.89                | 0.65 – 0.83                      | <i>“I felt excluded”</i>                                                                                                   |
| View of Yourself         | 0.88                | 0.70 – 0.77                      |                                                                                                                            |
| Sports and Leisure       | 0.72                | 0.46 – 0.77                      | <i>“I didn’t have the freedom to travel where I wanted”</i>                                                                |
| Work and School          | 0.87                | 0.67 – 0.82                      |                                                                                                                            |
| Dealing with Haemophilia | 0.65                | 0.47 – 0.67                      | <i>“I was dependent on the factor concentrate because of my hemophilia”</i>                                                |
| Future                   | 0.74                | 0.62 – 0.73                      |                                                                                                                            |
| Family                   | 0.82                | 0.63 – 0.66                      |                                                                                                                            |
| <b>Haemo-QoL-SF</b>      |                     |                                  |                                                                                                                            |
| Physical Health          | 0.91                | 0.79 – 0.89                      |                                                                                                                            |
| Feeling                  | 0.93                | 0.73 – 0.89                      |                                                                                                                            |
| View of Yourself         | 0.90                | 0.68 – 0.84                      |                                                                                                                            |
| Sports and Leisure       | 0.96                | 0.86 – 0.93                      |                                                                                                                            |
| Work and School          | 0.91                | 0.59 – 0.79                      | <i>“I was able to participate in school, even with my hemophilia”</i>                                                      |
| Dealing with Haemophilia | 0.96                | 0.73 – 0.91                      |                                                                                                                            |
| Treatment                | 0.87                | 0.72 – 0.82                      |                                                                                                                            |
| Future                   | 0.93                | 0.75 – 0.93                      |                                                                                                                            |
| Family                   | 0.72                | 0.52 – 0.67                      | <i>“My parents didn’t allow me to do certain things because of my hemophilia”</i>                                          |
| <b>VERITAS-Pro</b>       |                     |                                  |                                                                                                                            |
| Time                     | 0.94                | 0.76 – 0.88                      |                                                                                                                            |
| Dose                     | 0.41                | 0.34 – 0.52                      | <i>“I infuse at a lower dose than prescribed”</i><br><i>“I increase or decrease the dose without calling the hospital”</i> |
| Plan                     | 0.69                | 0.53 – 0.71                      | <i>“I ran out of factors and supplies before I order more”</i>                                                             |
| Remember                 | 0.82                | 0.64 – 0.75                      |                                                                                                                            |

|             |      |             |                                                                             |
|-------------|------|-------------|-----------------------------------------------------------------------------|
| Skip        | 0.95 | 0.85 – 0.91 |                                                                             |
| Communicate | 0.76 | 0.53 – 0.86 | <i>“I make treatment decisions myself rather than calling the hospital”</i> |

Haem-A-QoL: Haemophilia Quality of Life Questionnaire for Adults; Haemo-QOL-SF: Haemophilia Quality of Life Questionnaire for Children Short Form;  
VERITAS-Pro: Validated Hemophilia Regimen Treatment Adherence Scale-Prophylaxis

\* Refers to items with a weak corrected item-scale correlation < 0.6
